# Supplementary material for: Effectiveness of Colonoscopy Screening vs Sigmoidoscopy Screening in Colorectal Cancer
Source: PubMed Central journal article supplement (PMC10905314; doi:10.1001/jamanetworkopen.2024.0007), 2024-02-29
Supplement: jamanetwopen-e240007-s001.pdf [file jamanetwopen-e240007-s001.pdf]

## Supplementary Online Content

Juul FE, Cross AJ, Schoen RE, et al. Effectiveness of colonoscopy screening vs sigmoidoscopy screening in colorectal cancer. *JAMA Netw Open*. 2024;7(2):e240007. doi:10.1001/jamanetworkopen.2024.0007

**eTable 1.** Trial definition of a positive sigmoidoscopy screening test

**eTable 2.** Characteristics of the four sigmoidoscopy screening trials

**eTable 3.** Results of intention to treat analysis on CRC incidence and mortality after sigmoidoscopy or colonoscopy screening in each trial

**eMethods 1.** Summary description of included endoscopy screening trials

**eMethods 2.** Details on data acquisition and data protection legislation

**eMethods 3.** Presentation of calculations to estimate screening effect on CRC incidence and mortality

**eMethods 4.** Method description, validation of the simulation study

**eAppendix 1.** International Society for Pharmacoeconomics and Outcomes Research (ISPOR) reporting guideline checklist

**eAppendix 2.** Results validation of the simulation study, colorectal cancer incidence

**eReferences.**

This supplementary material has been provided by the authors to give readers additional information about their work.

**eTable 1. Trial definition of a positive sigmoidoscopy screening test**

| <b>Trial name</b> | <b>Findings at screening defined as a positive test</b>                                                                                                                                                                                                                                                              |
|-------------------|----------------------------------------------------------------------------------------------------------------------------------------------------------------------------------------------------------------------------------------------------------------------------------------------------------------------|
| NORCCAP           | Colorectal cancer<br>Any polyp 10 mm or larger in diameter<br>Any adenoma<br>A positive faecal occult blood test*                                                                                                                                                                                                    |
| PLCO              | Colorectal cancer<br>Any polyp or mass                                                                                                                                                                                                                                                                               |
| UKFSST            | Colorectal cancer<br>Any polyp 10 mm or larger in diameter<br>Three or more tubular adenomas smaller than 10 mm in diameter with low-grade dysplasia<br>Any adenoma smaller than 10 mm in diameter with tubulovillous or villous features or high-grade dysplasia                                                    |
| SCORE             | Colorectal cancer<br>Any polyp larger than 5 mm in diameter<br>Three or more tubular adenomas 5 mm in diameter or smaller with low-grade dysplasia<br>Any adenoma 5 mm in diameter or smaller with tubulovillous or villous features, or high-grade dysplasia<br>Inadequate bowel preparation and at least one polyp |

\* Half of individuals randomised to sigmoidoscopy screening were asked to deliver a stool sample for one-time faecal immunochemical testing on the day of the sigmoidoscopy

**eTable 2. Characteristics of the four sigmoidoscopy screening trials**

Age at enrolment was 55 to 64 years.

| Trial Name                                               | NORCCAP*                                                           | PLCO†                                                              | UKFSST                                                                                                                                                            | SCORE                                                                                                                  |
|----------------------------------------------------------|--------------------------------------------------------------------|--------------------------------------------------------------------|-------------------------------------------------------------------------------------------------------------------------------------------------------------------|------------------------------------------------------------------------------------------------------------------------|
| Country                                                  | Norway                                                             | US                                                                 | UK                                                                                                                                                                | Italy                                                                                                                  |
| Randomization and consent procedure                      | Pre to consent randomization based on national population registry | Expression of interest before randomization                        | Expression of interest before randomization                                                                                                                       | Expression of interest before randomization                                                                            |
| Inclusion period                                         | 1999-2000                                                          | 1993-2001                                                          | 1994-1999                                                                                                                                                         | 1995-1999                                                                                                              |
| Population                                               | General population in the city of Oslo and county of Telemark      | General population in the catchment areas of ten screening centres | Persons from selected general practices in catchment area of hospitals in 14 geographical centres who expressed an interest in screening based on a questionnaire | Persons randomly selected from registries at six trial centres were assessed for eligibility and interest in screening |
| Number of enrolled participants                          | 54 690                                                             | 99 208                                                             | 170 034                                                                                                                                                           | 34 272                                                                                                                 |
| Screening / usual care                                   | 13 638 / 41 052                                                    | 49 621 / 49 587                                                    | 57 098 / 112 936                                                                                                                                                  | 17 136 / 17 136                                                                                                        |
| Screening attendance                                     | 65% §                                                              | 87%                                                                | 71%                                                                                                                                                               | 58%                                                                                                                    |
| Colonoscopy attendance‡                                  | 14.0%                                                              | 22.6%                                                              | 3.6%                                                                                                                                                              | 4.6%                                                                                                                   |
| Follow to up time (median)                               | 15 years                                                           | 16 years (17 for mortality)                                        | 17 years                                                                                                                                                          | 15 years (19 for mortality)                                                                                            |
| National screening program during trial screening period | No organized CRC screening and very little opportunistic screening | Opportunistic screening                                            | No organized CRC screening and very little opportunistic screening                                                                                                | Opportunistic screening                                                                                                |

\*Participants randomized to flexible sigmoidoscopy were re to randomised 1:1 to receive a single faecal occult blood test (FOBT) or no additional testing.

†Flexible sigmoidoscopy was repeated at three or five years after baseline sigmoidoscopy. Screening attenders in the current study were individuals who were screened at baseline, and/or three or five years after baseline.

‡Proportion of individuals who attended colonoscopy after a positive screening test among individuals invited to sigmoidoscopy screening.

§The NORCCAP trial had pre to consent randomization which might affect attendance rate.

**eTable 3. Results of intention to treat analysis on CRC incidence and mortality after sigmoidoscopy or colonoscopy screening in each trial**

**A. NORwegian Colorectal Cancer Preventiontrial (NORCCAP)**

Trial sigmoidoscopy screening effects are used to estimate the trial's colonoscopy screening effects.

|                      | <b>Distal colorectal cancer</b>     |                | <b>Proximal colon cancer</b>        |                |                              |                | <b>All colorectal cancer</b>        |                |                              |                    |                           |             |
|----------------------|-------------------------------------|----------------|-------------------------------------|----------------|------------------------------|----------------|-------------------------------------|----------------|------------------------------|--------------------|---------------------------|-------------|
|                      | As observed in sigmoidoscopy trials |                | As observed in sigmoidoscopy trials |                | As estimated for colonoscopy |                | As observed in sigmoidoscopy trials |                | As estimated for colonoscopy |                    |                           |             |
|                      | <i>Rate ratio</i>                   | <i>CI, 95%</i> | <i>Rate ratio</i>                   | <i>CI, 95%</i> | <i>Rate ratio</i>            | <i>CI, 95%</i> | <i>Rate ratio</i>                   | <i>CI, 95%</i> | <i>Rate ratio</i>            | <i>CI, 95%</i>     | Numbers needed to switch* |             |
|                      |                                     |                |                                     |                |                              |                |                                     |                |                              | <i>Individuals</i> | <i>CI, 95%</i>            |             |
| <b>CRC incidence</b> |                                     |                |                                     |                |                              |                |                                     |                |                              |                    |                           |             |
| All individuals      | 0.71                                | (0.59-0.84)    | 0.91                                | (0.75-1.09)    | 0.76                         | (0.63-0.93)    | 0.79                                | (0.69-0.89)    | 0.73                         | (0.62-0.85)        | 565                       | (381-1095)  |
| Women                | 0.82                                | (0.62-1.07)    | 1.03                                | (0.81-1.30)    | 0.92                         | (0.67-1.21)    | 0.93                                | (0.78-1.11)    | 0.87                         | (0.69-1.11)        | 660                       | (296-inf.)  |
| Men                  | 0.63                                | (0.49-0.80)    | 0.76                                | (0.57-1.02)    | 0.64                         | (0.48-0.87)    | 0.67                                | (0.55-0.80)    | 0.62                         | (0.51-0.77)        | 709                       | (455-1606)  |
| <b>CRC mortality</b> |                                     |                |                                     |                |                              |                |                                     |                |                              |                    |                           |             |
| All individuals      | 0.92                                | (0.68-1.24)    | 0.69                                | (0.47-0.99)    | 0.66                         | (0.44-0.98)    | 0.82                                | (0.65-1.02)    | 0.81                         | (0.62-1.05)        | 8950                      | (1929-inf.) |
| Women                | 1.34                                | (0.84-2.11)    | 0.76                                | (0.44-1.24)    | 0.90                         | (0.52-1.55)    | 1.05                                | (0.75-1.44)    | 1.12                         | (0.75-1.67)        | -                         | -           |
| Men                  | 0.71                                | (0.46-1.05)    | 0.62                                | (0.34-1.05)    | 0.52                         | (0.30-0.92)    | 0.66                                | (0.47-0.90)    | 0.62                         | (0.44-0.88)        | 2566                      | (1188-inf.) |

*CI: confidence interval, CRC: colorectal cancer.*

*\*Number of individuals that need to switch screening method (from sigmoidoscopy to colonoscopy) to prevent one event.*

eTable 3 (cont'd).

**B. Prostate, Lung, Colorectal and Ovarian cancerscreening trial (PLCO)**

Trial sigmoidoscopy screening effects are used to estimate the trial's colonoscopy screening effects.

|                      | Distal colorectal cancer            |             | Proximal colorectal cancer          |             |                              |             | All colorectal cancer               |             |                              |             |                           |             |
|----------------------|-------------------------------------|-------------|-------------------------------------|-------------|------------------------------|-------------|-------------------------------------|-------------|------------------------------|-------------|---------------------------|-------------|
|                      | As observed in sigmoidoscopy trials |             | As observed in sigmoidoscopy trials |             | As estimated for colonoscopy |             | As observed in sigmoidoscopy trials |             | As estimated for colonoscopy |             |                           |             |
|                      | Rate ratio                          | CI, 95%     | Rate ratio                          | CI, 95%     | Rate ratio                   | CI, 95%     | Rate ratio                          | CI, 95%     | Rate ratio                   | CI, 95%     | Numbers needed to switch* |             |
|                      |                                     |             |                                     |             |                              |             |                                     |             |                              |             | Individuals               | CI, 95%     |
| <b>CRC incidence</b> |                                     |             |                                     |             |                              |             |                                     |             |                              |             |                           |             |
| All individuals      | 0.75                                | (0.66-0.86) | 0.94                                | (0.82-1.08) | 0.80                         | (0.68-0.94) | 0.85                                | (0.77-0.93) | 0.78                         | (0.69-0.88) | 831                       | (582-1448)  |
| Women                | 0.98                                | (0.79-1.23) | 0.88                                | (0.72-1.07) | 0.87                         | (0.68-1.11) | 0.93                                | (0.80-1.07) | 0.92                         | (0.75-1.13) | 11 902                    | (896-inf.)  |
| Men                  | 0.64                                | (0.53-0.76) | 1.00                                | (0.82-1.22) | 0.79                         | (0.63-0.98) | 0.79                                | (0.69-0.90) | 0.71                         | (0.60-0.83) | 558                       | (414-859)   |
| <b>CRC mortality</b> |                                     |             |                                     |             |                              |             |                                     |             |                              |             |                           |             |
| All individuals      | 0.62                                | (0.46-0.82) | 1.13                                | (0.86-1.48) | 0.86                         | (0.63-1.17) | 0.88                                | (0.73-1.05) | 0.77                         | (0.60-0.97) | 1719                      | (1129-3596) |
| Women                | 0.81                                | (0.49-1.33) | 1.10                                | (0.75-1.63) | 0.98                         | (0.62-1.54) | 1.04                                | (0.78-1.39) | 0.97                         | (0.66-1.43) | 3849                      | (1201-inf.) |
| Men                  | 0.54                                | (0.37-0.76) | 1.15                                | (0.79-1.69) | 0.80                         | (0.53-1.19) | 0.78                                | (0.61-0.99) | 0.66                         | (0.49-0.88) | 1280                      | (839-2691)  |

CI: confidence interval, CRC: colorectal cancer.

\*Number of individuals that need to switch screening method (from sigmoidoscopy to colonoscopy) to prevent one event.

**eTable 3 (cont'd).**

**C. UK Flexible Sigmoidoscopy Screening Trial (UKFSST)**

Trial sigmoidoscopy screening effects are used to estimate the trial's colonoscopy screening effects.

|                      | <b>Distal colorectal cancer</b>     |                | <b>Proximal colon cancer</b>        |                |                              |                | <b>All colorectal cancer</b>        |                |                              |                    |                                  |            |
|----------------------|-------------------------------------|----------------|-------------------------------------|----------------|------------------------------|----------------|-------------------------------------|----------------|------------------------------|--------------------|----------------------------------|------------|
|                      | As observed in sigmoidoscopy trials |                | As observed in sigmoidoscopy trials |                | As estimated for colonoscopy |                | As observed in sigmoidoscopy trials |                | As estimated for colonoscopy |                    |                                  |            |
|                      | <i>Rate ratio</i>                   | <i>CI, 95%</i> | <i>Rate ratio</i>                   | <i>CI, 95%</i> | <i>Rate ratio</i>            | <i>CI, 95%</i> | <i>Rate ratio</i>                   | <i>CI, 95%</i> | <i>Rate ratio</i>            | <i>CI, 95%</i>     | <i>Numbers needed to switch*</i> |            |
|                      |                                     |                |                                     |                |                              |                |                                     |                |                              | <i>Individuals</i> | <i>CI, 95%</i>                   |            |
| <b>CRC incidence</b> |                                     |                |                                     |                |                              |                |                                     |                |                              |                    |                                  |            |
| All individuals      | 0.61                                | (0.56-0.67)    | 0.94                                | (0.85-1.04)    | 0.71                         | (0.63-0.79)    | 0.73                                | (0.68-0.78)    | 0.65                         | (0.59-0.70)        | 413                              | (352-501)  |
| Women                | 0.63                                | (0.54-0.73)    | 1.03                                | (0.89-1.19)    | 0.77                         | (0.66-0.91)    | 0.80                                | (0.72-0.89)    | 0.69                         | (0.60-0.79)        | 420                              | (326-588)  |
| Men                  | 0.60                                | (0.54-0.67)    | 0.86                                | (0.75-1.00)    | 0.66                         | (0.56-0.76)    | 0.69                                | (0.63-0.75)    | 0.62                         | (0.56-0.69)        | 416                              | (340-537)  |
| <b>CRC mortality</b> |                                     |                |                                     |                |                              |                |                                     |                |                              |                    |                                  |            |
| All individuals      | 0.56                                | (0.47-0.66)    | 0.92                                | (0.77-1.11)    | 0.65                         | (0.53-0.80)    | 0.70                                | (0.62-0.79)    | 0.60                         | (0.51-0.70)        | 1109                             | (860-1562) |
| Women                | 0.64                                | (0.48-0.86)    | 0.88                                | (0.68-1.13)    | 0.66                         | (0.49-0.89)    | 0.74                                | (0.62-0.90)    | 0.64                         | (0.50-0.83)        | 1434                             | (891-3666) |
| Men                  | 0.52                                | (0.42-0.65)    | 0.97                                | (0.76-1.25)    | 0.66                         | (0.50-0.89)    | 0.67                                | (0.57-0.79)    | 0.58                         | (0.47-0.70)        | 972                              | (731-1448) |

*CI: confidence interval, CRC: colorectal cancer.*

*\*Number of individuals that need to switch screening method (from sigmoidoscopy to colonoscopy) to prevent one event.*

eTable 3 (cont'd).

**D. Screening for Colon REctum trial (SCORE)**

Trial sigmoidoscopy screening effects are used to estimate the trial's colonoscopy screening effects.

|                      | <b>Distal colorectal cancer</b>     |                | <b>Proximal colon cancer</b>        |                |                              |                | <b>All colorectal cancer</b>        |                |                              |                    |                                  |               |
|----------------------|-------------------------------------|----------------|-------------------------------------|----------------|------------------------------|----------------|-------------------------------------|----------------|------------------------------|--------------------|----------------------------------|---------------|
|                      | As observed in sigmoidoscopy trials |                | As observed in sigmoidoscopy trials |                | As estimated for colonoscopy |                | As observed in sigmoidoscopy trials |                | As estimated for colonoscopy |                    |                                  |               |
|                      | <i>Rate ratio</i>                   | <i>CI, 95%</i> | <i>Rate ratio</i>                   | <i>CI, 95%</i> | <i>Rate ratio</i>            | <i>CI, 95%</i> | <i>Rate ratio</i>                   | <i>CI, 95%</i> | <i>Rate ratio</i>            | <i>CI, 95%</i>     | <i>Numbers needed to switch*</i> |               |
|                      |                                     |                |                                     |                |                              |                |                                     |                |                              | <i>Individuals</i> | <i>CI, 95%</i>                   |               |
| <b>CRC incidence</b> |                                     |                |                                     |                |                              |                |                                     |                |                              |                    |                                  |               |
| All individuals      | 0.70                                | (0.58-0.83)    | 1.03                                | (0.83-1.28)    | 0.89                         | (0.72-1.12)    | 0.81                                | (0.71-0.93)    | 0.76                         | (0.65-0.89)        | 781                              | (528-1501)    |
| Women                | 0.58                                | (0.42-0.80)    | 1.15                                | (0.82-1.61)    | 0.94                         | (0.65-1.36)    | 0.79                                | (0.63-0.98)    | 0.71                         | (0.55-0.92)        | 623                              | (399-1492)    |
| Men                  | 0.77                                | (0.62-0.97)    | 0.95                                | (0.72-1.27)    | 0.86                         | (0.65-1.14)    | 0.83                                | (0.70-0.99)    | 0.80                         | (0.66-0.97)        | 948                              | (520-5327)    |
| <b>CRC mortality</b> |                                     |                |                                     |                |                              |                |                                     |                |                              |                    |                                  |               |
| All individuals      | 0.68                                | (0.49-0.96)    | 0.82                                | (0.57-1.18)    | 0.69                         | (0.45-1.04)    | 0.77                                | (0.61-0.98)    | 0.72                         | (0.54-0.95)        | 1942                             | (1074-10 122) |
| Women                | 0.63                                | (0.33-1.18)    | 1.27                                | (0.68-2.40)    | 1.04                         | (0.51-2.13)    | 0.90                                | (0.59-1.36)    | 0.81                         | (0.49-1.35)        | 2115                             | (958-inf.)    |
| Men                  | 0.71                                | (0.47-1.07)    | 0.66                                | (0.42-1.04)    | 0.56                         | (0.34-0.93)    | 0.73                                | (0.54-0.97)    | 0.68                         | (0.48-0.97)        | 1762                             | (824-inf.)    |

CI: confidence interval, CRC: colorectal cancer.

\*Number of individuals that need to switch screening method (from sigmoidoscopy to colonoscopy) to prevent one event.

## eMethods 1. Summary description of included endoscopy screening trials

Data used in our simulation analysis were from four randomized sigmoidoscopy screening trials in Norway (NORwegian Colorectal CAncer Prevention trial; NORCCAP) (ClinicalTrials.gov: NCT00119912), the US (Prostate, Lung, Colorectal and Ovarian cancer screening trial; PLCO) (ClinicalTrials.gov: NCT01696981), the UK (UK Flexible Sigmoidoscopy Screening Trial; UKFSST) (ISRCTN number: 28352761) and Italy (Screening for Colon REctum trial; SCORE) (ISRCTN number: 27814061). Additionally, we used data from the Norwegian part the Nordic-European Initiative on Colorectal Cancer (NordICC) trial (ClinicalTrials.gov: NCT 00883792) on colonoscopy screening to validate our simulation model. All trials were approved by the ethics committees in the respective countries or regions.

In brief, all trials included individuals aged 55-64 years at enrolment, randomised to once-only sigmoidoscopy screening or usual care (i.e. no screening invitation). The NORCCAP trial also included individuals aged 50-54 years and the PLCO trial included individuals aged 65-74 years (these age groups are not included in the current analysis). Individuals randomised to screening in PLCO were also offered a second sigmoidoscopy three or five years later.<sup>1</sup> In NORCCAP, 50% of individuals randomised to screening were asked to deliver a stool sample for one-time faecal immunochemical testing (FIT) on the day of the sigmoidoscopy. Screening in the trials was performed between 1993 and 2001. The primary endpoints in all trials were CRC incidence and mortality.

Participants in the control groups were not offered any intervention as part of the trials, but received health care, including similar access to cancer screening as the general population in each trial area.

All individuals in NORCCAP, UKFSST and SCORE with a positive sigmoidoscopy screening test were referred for colonoscopy (Figure 1). Individuals in PLCO with a positive screening test were referred to their primary care physician for follow-up. There were some differences between the trials in the definition of a positive screening test (eTable 1 in Supplement).

Details from the NordICC trial have been published previously.<sup>2</sup> In brief, screening-naïve individuals 55-64 years of age in Poland, Norway, Sweden, and the Netherlands were randomised 1:2 to once-only colonoscopy screening or usual care (no screening invitation). Screening was performed between 2009 and 2014 and primary endpoints were CRC incidence and mortality after 10 and 15 years.

## **eMethods 2. Details on data acquisition and data protection legislation**

Due to new data protection legislation in Europe, individual patient data could not be shared across the trials and data therefore needed to be shared as aggregated anonymized data.

In the data from UKFSST, small numbers (7 or lower) could not be specified due to data protection legislation. Accordingly, the value “0-7” was given for any strata where fewer than eight events occurred. In the analyses, we used the value seven for these strata, which may overestimate the number of events; this applied to the screening and usual care group.

### eMethods 3. Presentation of calculations to estimate screening effect on CRC incidence and mortality

#### Step 1: Sigmoidoscopy screening effect

Cumulative incidence rates in sigmoidoscopy screening and usual care groups were calculated from the observed data in each trial. Rates were then used to calculate rate ratios (formula 1) and number of prevented events (CRC cases or CRC deaths) per 100 000 person-years (formula 2) by sigmoidoscopy screening compared to usual care.

Analysis groups according to manuscript Figure 1.

- **Group [A]** Individuals randomised to usual care (controls)
- **Group [B]** Individuals randomised to sigmoidoscopy screening, but declined to undergo screening (non attenders)
- **Group [C]** Individuals randomised to sigmoidoscopy screening, attended screening, and had a positive screening test leading to a subsequent colonoscopy (screening positive)
- **Group [D]** Individuals randomised to sigmoidoscopy screening, attended screening, but did not have a subsequent colonoscopy (screening negative)

Formula 1

$$\text{Rate ratio}_{\text{sigmoidoscopy}} = \frac{\frac{\text{Events}_{\text{Screening group}}}{\text{PYr}_{\text{Screening group}}}}{\frac{\text{Events}_{\text{Usual care group}}}{\text{PYr}_{\text{Usual care group}}}} = \frac{\text{Events}_{\text{Screening non-attenders}} + \text{Events}_{\text{Screening+colonoscopy}} + \text{Events}_{\text{distal screening negative}} + \text{Events}_{\text{proximal screening negative}}}{\frac{\text{Events}_{\text{Usual care group}}}{\text{PYr}_{\text{Usual care group}}}}$$

Formula 2

$$\text{Number of prevented events per PYr}_{\text{sigmoidoscopy}} = \frac{\text{Events}_{\text{Screening group}}}{\text{PYr}_{\text{Screening group}}} - \frac{\text{Events}_{\text{Usual care group}}}{\text{PYr}_{\text{Usual care group}}}$$

PYr = person-year

Results from the individual trials were then pooled in a meta-analysis (the inverse to variance of the trial specific estimates as weights), to calculate rate ratios and number of prevented events per 100 000 person-years across trials. Variance of the overall estimate was the inverse of the sum of the weights.

#### Step 2: Colonoscopy screening effect

Next, we wanted to estimate the additional number of events (CRC cases or CRC deaths) prevented with colonoscopy, compared to sigmoidoscopy. Estimates were calculated using the observed number of events in the proximal colon among screening negative (i.e. sigmoidoscopy screening attenders without subsequent colonoscopy, group [D] in manuscript Figure 1) and the sigmoidoscopy screening rate ratios for distal CRC (incidence or mortality). First, we calculated the number of proximal events prevented if colonoscopy had been used in the sigmoidoscopy screening negative individuals in each trial:

Formula 3

$$\text{Proximal events prevented by switching to colonoscopy} = \text{Events}_{\text{proximal colon}_{\text{sigmoidoscopy, screening negative}}} * (1 - \text{Rate ratio}_{\text{sigmoidoscopy distal colon}})$$

The resulting numbers of events prevented were then subtracted from the observed total number of proximal events in the sigmoidoscopy screening arm to estimate the number of events if colonoscopy was used instead of sigmoidoscopy:

Formula 4

$$\text{Events proximal colon}_{\text{Colonoscopy, screening group}} = \text{Events proximal colon}_{\text{sigmoidoscopy, screening group}} - \text{Proximal events prevented by switching to colonoscopy}$$

We then used the resulting number of events in the colonoscopy screening group in each trial to calculate trial specific rate ratios (formula 5) and number of events prevented per 100 000 person-years (formula 6) by colonoscopy compared to usual care:

Formula 5

$$\text{Rate ratio}_{\text{colonoscopy}} = \frac{\frac{\text{Events}_{\text{Screening group}}}{\text{PYr}_{\text{Screening group}}}}{\frac{\text{Events}_{\text{Usual care group}}}{\text{PYr}_{\text{Usual care group}}}}$$

$$= \frac{\text{Events}_{\text{sigmoidoscopy, screening non-attenders}} + \text{Events}_{\text{sigmoidoscopy screening attenders with follow-up colonoscopy}} + \text{Events}_{\text{distal sigmoidoscopy screening negative}} + \text{Events}_{\text{proximal}_{\text{Colonoscopy, screening group}}}}{\frac{\text{PYr}_{\text{Screening group}}}{\frac{\text{Events}_{\text{Usual care group}}}{\text{PYr}_{\text{Usual care group}}}}}}$$

Formula 6

$$\text{Number of prevented cases per PYr}_{\text{colonoscopy}} = \frac{\text{Events}_{\text{sigmoidoscopy, screening group}} - \text{Events}_{\text{prevented proximal}_{\text{Colonoscopy, screening group}}}}{\text{PYr}_{\text{Screening group}}} - \frac{\text{Events}_{\text{Usual care group}}}{\text{PYr}_{\text{Usual care group}}}$$

PYr = person-years

Finally, we pooled the results from the individual trials in a meta-analysis (again using the inverse-variance of trial specific estimates as weights) to calculate rate ratios and number of prevented events per 100 000 person-years across trials, variance of the overall estimate being again the inverse of the sum of the weights. Bootstrapping was used to estimate the variance of the colonoscopy metrics.

#### **eMethods 4. Method description, validation of the simulation study**

To validate the results from our simulation, we compared 10-year CRC incidence in the Norwegian sigmoidoscopy trial (NORCCAP) with the 10-year data from the Norwegian part of the NordICC colonoscopy trial.<sup>3,4</sup> Participants in the two trials are comparable; they live in the same country, had the same age, and participation rates for screening were comparable (sigmoidoscopy: 65%, colonoscopy: 61%). Both screening tools were compared with usual care, and post-randomization consent was used in both trials. With a similar analytical approach as previously described (except we used individuals instead of person-years to make it comparable to NordICC), we simulated the colonoscopy screening effect in NORCCAP after 10-years follow-up, and compared the results to the observed results from the NordICC trial.

**eAppendix 1. International Society for Pharmacoeconomics and Outcomes Research (ISPOR) reporting guideline checklist <sup>5</sup>**

| Section and topic                                                                                                                                                                                                                                           | Item # | Descriptor                                                                                                                                                                                                                                                                                                                            | Where in manuscript                                                                     |
|-------------------------------------------------------------------------------------------------------------------------------------------------------------------------------------------------------------------------------------------------------------|--------|---------------------------------------------------------------------------------------------------------------------------------------------------------------------------------------------------------------------------------------------------------------------------------------------------------------------------------------|-----------------------------------------------------------------------------------------|
| Study Design                                                                                                                                                                                                                                                | 1      | Description of Study Design                                                                                                                                                                                                                                                                                                           | Manuscript pages 6 and 7.                                                               |
| Introduction <ul style="list-style-type: none"> <li>Background</li> </ul>                                                                                                                                                                                   | 2      | Scientific background and explanation of rationale including discussion of the suitability of the database employed                                                                                                                                                                                                                   | Manuscript pages 6 and 7, eMethods 1.                                                   |
| Methods <ul style="list-style-type: none"> <li>Defining the question</li> <li>Objectives</li> <li>Selection of study design</li> <li>Selection of data source <ul style="list-style-type: none"> <li>Definition of treatment cohorts</li> </ul> </li> </ul> | 3      | Clearly defined goals of the study with description of specific sub-questions. Description of study design and why it was chosen; Description of strengths and weaknesses of data source and how study groups were identified, including description of critical variables: diagnostic criteria, exposures, and potential confounders | Manuscript pages 6 and 7, eMethods 1-3.                                                 |
| <ul style="list-style-type: none"> <li>Measurement of treatment effects <ul style="list-style-type: none"> <li>Classification bias</li> </ul> </li> </ul>                                                                                                   | 4      | Discuss how treatment effects were measured and how classification bias was addressed.                                                                                                                                                                                                                                                | Manuscript pages 7-10.                                                                  |
| <ul style="list-style-type: none"> <li>Measurement of outcomes <ul style="list-style-type: none"> <li>Classification bias</li> </ul> </li> </ul>                                                                                                            | 5      | Discuss how outcomes were measured and how classification bias was addressed.                                                                                                                                                                                                                                                         | Manuscript pages 7-10.                                                                  |
| <ul style="list-style-type: none"> <li>Confounding <ul style="list-style-type: none"> <li>By indication</li> <li>Measured vs. unmeasured</li> <li>Time dependent</li> </ul> </li> <li>Analytic plan to address confounding</li> </ul>                       | 6      | Discuss the potential for confounding, both measured and unmeasured, and how this was assessed and addressed                                                                                                                                                                                                                          | Not discussed in the current study because it is based on randomized controlled trials. |
| Discussion <ul style="list-style-type: none"> <li>Internal validity</li> </ul>                                                                                                                                                                              | 7      | Interpretation of results, taking into account confounding and imprecision of results                                                                                                                                                                                                                                                 | Manuscript pages 14-17, eMethods 1 and 3.                                               |
| <ul style="list-style-type: none"> <li>Generalizability</li> </ul>                                                                                                                                                                                          | 8      | Generalizability (external validity) of the study findings.                                                                                                                                                                                                                                                                           | Manuscript pages 14-16.                                                                 |
| <ul style="list-style-type: none"> <li>Overall evidence</li> </ul>                                                                                                                                                                                          | 9      | General interpretation of the results in the context of current evidence.                                                                                                                                                                                                                                                             | Manuscript pages 14-17.                                                                 |

## **eAppendix 2. Results validation of the simulation study, colorectal cancer incidence**

The 10-year risk of CRC was 1.5% in the control groups in both the NORCCAP trial and the Norwegian part of the NordICC trial. In NORCCAP, the estimated effect of colonoscopy after 10-year follow-up was 26 (95% CI, 3-49) fewer CRC cases per 10 000 individuals, corresponding to a risk ratio of 0.83 (95% CI, 0.70-0.99). In comparison, the observed result from the Norwegian part of the NordICC trial was 37 (95% CI, 7-68) fewer CRC cases per 10 000 individuals, corresponding to a risk ratio of 0.76 (95% CI, 0.58-0.94).<sup>4</sup>

## eReferences.

1. Miller EA, Pinsky PF, Schoen RE, Prorok PC, Church TR. Effect of flexible sigmoidoscopy screening on colorectal cancer incidence and mortality: long-term follow-up of the randomised US PLCO cancer screening trial. *Lancet Gastroenterol Hepatol.* 2019;4(2):101-110.
2. Bretthauer M, Kaminski MF, Loberg M, et al. Population-Based Colonoscopy Screening for Colorectal Cancer: A Randomized Clinical Trial. *JAMA Intern Med.* 2016;176(7):894-902.
3. Holme O, Loberg M, Kalager M, et al. Effect of flexible sigmoidoscopy screening on colorectal cancer incidence and mortality: a randomized clinical trial. *JAMA.* 2014;312(6):606-615.
4. Bretthauer M, Loberg M, Wieszczy P, et al. Effect of Colonoscopy Screening on Risks of Colorectal Cancer and Related Death. *N Engl J Med.* 2022.
5. Berger ML, Mamdani M, Atkins D, Johnson ML. Good Research Practices for Comparative Effectiveness Research: Defining, Reporting and Interpreting Nonrandomized Studies of Treatment Effects Using Secondary Data Sources: The ISPOR Good Research Practices for Retrospective Database Analysis Task Force Report—Part I. *Value Health.* 2009;12(8):1044-1052.
